# Supplementary material for: Life-History Traits from Embryonic Development to Reproduction in the American Cockroach
Source: MDPI journal article supplement (doi:10.3390/insects13060551), 2022-06-16
Supplement: s1 [file s1]

**Table S1.** Mean values of nymph instar, body weight, body length and body width.

| Nymph | Instar (days)    |      | Body weight (g $\times 10^{-2}$ ) |    | Body length (mm) |    | Body width (mm)  |    |
|-------|------------------|------|-----------------------------------|----|------------------|----|------------------|----|
|       | Mean $\pm$ SD    | N    | Mean $\pm$ SD                     | N  | Mean $\pm$ SD    | N  | Mean $\pm$ SD    | N  |
| N1    | 9.13 $\pm$ 0.94  | 1627 | 0.40 $\pm$ 0.02                   | 10 | 4.39 $\pm$ 0.30  | 10 | 1.82 $\pm$ 0.11  | 10 |
| N2    | 10.43 $\pm$ 1.02 | 741  | 0.58 $\pm$ 0.06                   | 10 | 6.21 $\pm$ 0.34  | 10 | 2.31 $\pm$ 0.15  | 10 |
| N3    | 9.83 $\pm$ 1.65  | 374  | 0.91 $\pm$ 0.12                   | 10 | 6.76 $\pm$ 0.28  | 10 | 2.84 $\pm$ 0.10  | 10 |
| N4    | 9.23 $\pm$ 1.62  | 191  | 1.78 $\pm$ 0.48                   | 10 | 7.80 $\pm$ 0.51  | 12 | 3.03 $\pm$ 0.08  | 10 |
| N5    | 9.09 $\pm$ 2.53  | 93   | 2.16 $\pm$ 0.20                   | 10 | 8.49 $\pm$ 0.49  | 12 | 3.68 $\pm$ 0.37  | 10 |
| N6    | 16.28 $\pm$ 1.83 | 39   | 3.43 $\pm$ 0.60                   | 10 | 10.06 $\pm$ 0.97 | 12 | 4.11 $\pm$ 0.07  | 10 |
| N7    | 21.07 $\pm$ 1.90 | 73   | 5.37 $\pm$ 1.06                   | 10 | 11.91 $\pm$ 0.85 | 10 | 4.67 $\pm$ 0.24  | 10 |
| N8    | 18.00 $\pm$ 2.29 | 51   | 8.55 $\pm$ 1.06                   | 10 | 13.70 $\pm$ 0.82 | 10 | 5.80 $\pm$ 0.26  | 10 |
| N9    | 17.56 $\pm$ 3.83 | 41   | 23.49 $\pm$ 7.56                  | 14 | 18.04 $\pm$ 1.57 | 14 | 6.77 $\pm$ 0.09  | 10 |
| N10   | 19.22 $\pm$ 2.27 | 32   | 29.27 $\pm$ 9.19                  | 14 | 20.57 $\pm$ 1.91 | 14 | 6.98 $\pm$ 0.10  | 11 |
| N11   | 19.67 $\pm$ 2.73 | 36   | 44.35 $\pm$ 5.71                  | 11 | 24.00 $\pm$ 0.89 | 11 | 8.40 $\pm$ 0.27  | 11 |
| N12   | 17.79 $\pm$ 2.41 | 28   | 44.42 $\pm$ 3.67                  | 11 | 25.20 $\pm$ 0.63 | 10 | 9.11 $\pm$ 0.17  | 10 |
| N13   | 19.59 $\pm$ 3.15 | 27   | 51.44 $\pm$ 4.09                  | 10 | 26.00 $\pm$ 0.67 | 10 | 11.20 $\pm$ 0.79 | 10 |
| N14   | 32.85 $\pm$ 5.64 | 27   | 61.75 $\pm$ 7.39                  | 10 | 28.30 $\pm$ 0.95 | 10 | 11.90 $\pm$ 0.88 | 10 |

\* Nymphal instars were the result of multiple observations, and only those groups with a population of 10 or more were counted.

**Table S2.** P values of body weight, body length, and body width between adjacent pairs of nymphal instars. (A) Body weight. (B) Body length. (C) Body width.

| Nymph | N1                      |                         |
|-------|-------------------------|-------------------------|
| N2    | 2.92 x 10 <sup>-8</sup> | N2                      |
| N3    | 2.60 x 10 <sup>-7</sup> | N3                      |
| N4    | 2.94 x 10 <sup>-5</sup> | N4                      |
| N5    | 0.031636                | N5                      |
| N6    | 2.21 x 10 <sup>-6</sup> | 5.27 x 10 <sup>-6</sup> |
| N7    | 8.34 x 10 <sup>-5</sup> | N7                      |
| N8    | 2.67 x 10 <sup>-6</sup> | N8                      |
| N9    | 3.33 x 10 <sup>-6</sup> | N9                      |
| N10   | 0.080525                | N10                     |
| N11   | 8.55 x 10 <sup>-5</sup> | N11                     |
| N12   | 0.148923                | N12                     |
| N13   | 0.004292                | 0.028303                |
| N14   | 7.66 x 10 <sup>-6</sup> | 0.001144                |

\* (A) P values of body weight.

| Nymph | N1                       |                         |
|-------|--------------------------|-------------------------|
| N2    | 2.29 x 10 <sup>-10</sup> | N2                      |
| N3    | 9.58 x 10 <sup>-4</sup>  | N3                      |
| N4    | 1.16 x 10 <sup>-5</sup>  | N4                      |
| N5    | 0.002545                 | N5                      |
| N6    | 3.88 x 10 <sup>-7</sup>  | 5.52 x 10 <sup>-5</sup> |
| N7    | 1.35 x 10 <sup>-4</sup>  | N7                      |
| N8    | 1.44 x 10 <sup>-4</sup>  | N8                      |
| N9    | 6.78 x 10 <sup>-8</sup>  | N9                      |
| N10   | 7.22 x 10 <sup>-4</sup>  | N10                     |
| N11   | 1.42 x 10 <sup>-5</sup>  | N11                     |
| N12   | 0.002316                 | N12                     |
| N13   | 1.51 x 10 <sup>-5</sup>  | 0.013089                |
| N14   | 1.78 x 10 <sup>-9</sup>  | 6.48 x 10 <sup>-6</sup> |

\* (B) P values of body length.

| Nymph | N1                      |                         |                         |                          |          |                         |                         |                         |                         |                          |                          |                         |          |
|-------|-------------------------|-------------------------|-------------------------|--------------------------|----------|-------------------------|-------------------------|-------------------------|-------------------------|--------------------------|--------------------------|-------------------------|----------|
| N2    | 1.87 x 10 <sup>-7</sup> | N2                      |                         |                          |          |                         |                         |                         |                         |                          |                          |                         |          |
| N3    |                         | 2.74 x 10 <sup>-8</sup> | N3                      |                          |          |                         |                         |                         |                         |                          |                          |                         |          |
| N4    |                         |                         | 1.66 x 10 <sup>-4</sup> | N4                       |          |                         |                         |                         |                         |                          |                          |                         |          |
| N5    |                         |                         |                         | 3.49 x 10 <sup>-5</sup>  | N5       |                         |                         |                         |                         |                          |                          |                         |          |
| N6    |                         |                         |                         | 4.78 x 10 <sup>-17</sup> | 0.001928 | N6                      |                         |                         |                         |                          |                          |                         |          |
| N7    |                         |                         |                         |                          |          | 1.45 x 10 <sup>-6</sup> | N7                      |                         |                         |                          |                          |                         |          |
| N8    |                         |                         |                         |                          |          |                         | 7.37 x 10 <sup>-9</sup> | N8                      |                         |                          |                          |                         |          |
| N9    |                         |                         |                         |                          |          |                         |                         | 1.63 x 10 <sup>-9</sup> | N9                      |                          |                          |                         |          |
| N10   |                         |                         |                         |                          |          |                         |                         |                         | 7.64 x 10 <sup>-5</sup> | N10                      |                          |                         |          |
| N11   |                         |                         |                         |                          |          |                         |                         |                         |                         | 5.36 x 10 <sup>-13</sup> | N11                      |                         |          |
| N12   |                         |                         |                         |                          |          |                         |                         |                         |                         |                          | 9.00 x 10 <sup>-7</sup>  | N12                     |          |
| N13   |                         |                         |                         |                          |          |                         |                         |                         |                         |                          | 9.64 x 10 <sup>-10</sup> | 1.73 x 10 <sup>-7</sup> | N13      |
| N14   |                         |                         |                         |                          |          |                         |                         |                         |                         |                          | 1.08 x 10 <sup>-10</sup> |                         | 0.076638 |

\*(C) P values of body width.
